# Supplementary material for: Cu(ii), Ga(iii) and In(iii) complexes of 2-acetylpyridine N(4)-phenylthiosemicarbazone: synthesis, spectral characterization and biological activities
Source: Royal Society of Chemistry journal article supplement (doi:10.1039/c7md00415j), 2017-01-01
Supplement: c7md00415j1.pdf [file c7md00415j1.pdf]

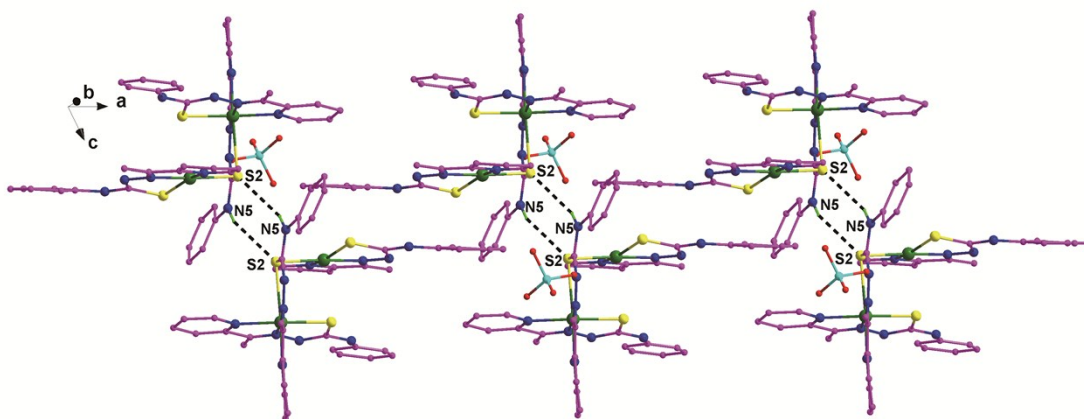

**Fig.S1** The molecular packing of **1** projected along the *b*-axis. Dashed lines represent hydrogen bonds.

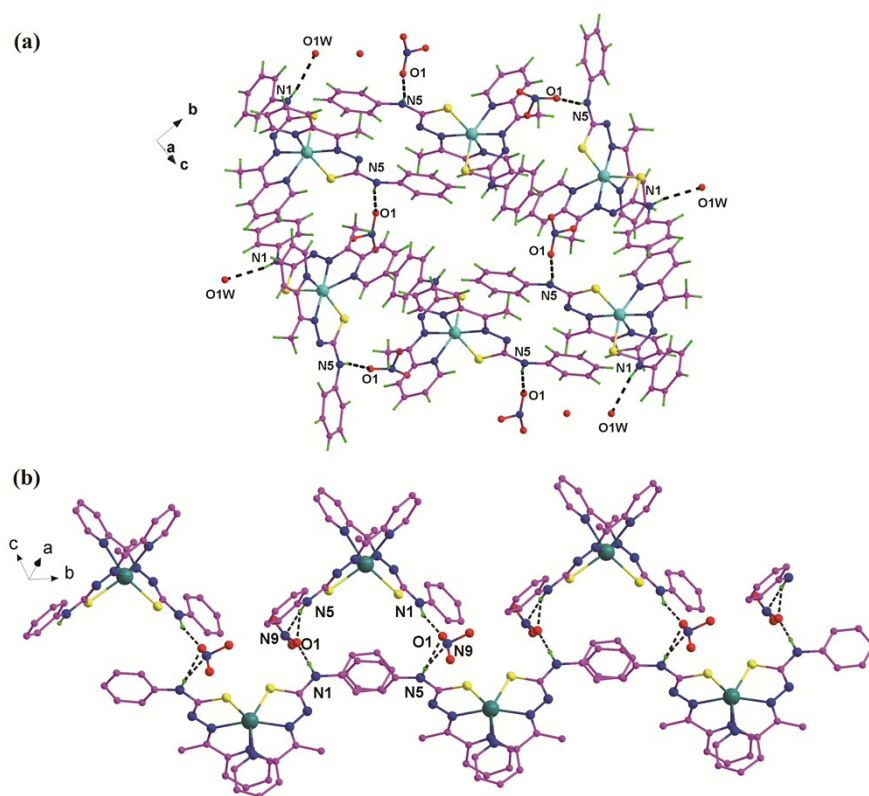

**Fig.S2** (a) The molecular packing of **2** projected along the *a*-axis. Dashed lines represent hydrogen bonds. (b) One-dimensional zigzag chain structure of **3** along *b* axis constructed by intermolecular hydrogen bond interactions.
